# Supplementary material for: Improving the photocatalytic activity of porphyrins for hydrogen evolution from water splitting through combined effects inspired by meso-carboxyfuryl substitution
Source: Royal Society of Chemistry journal article supplement (doi:10.1039/d4nj00059e), 2024-01-01
Supplement: d4nj00059e1.pdf [file d4nj00059e1.pdf]

**ESI**

## **Improving Photocatalytic Activity of Porphyrin on Hydrogen Evolution from Water Splitting through Combined Effects Inspired by meso-Carboxyfuryl Substitution**

Zhou Zhou, Guo-Lei Zhang, Yue-Xin Song and Ying-Hui Zhang \*

School of Materials Science and Engineering, No.38 Tongyan Road, Jinnan District, Tianjin , P.R. China 300350,  
Email: zhangyhi@nankai.edu.cn.

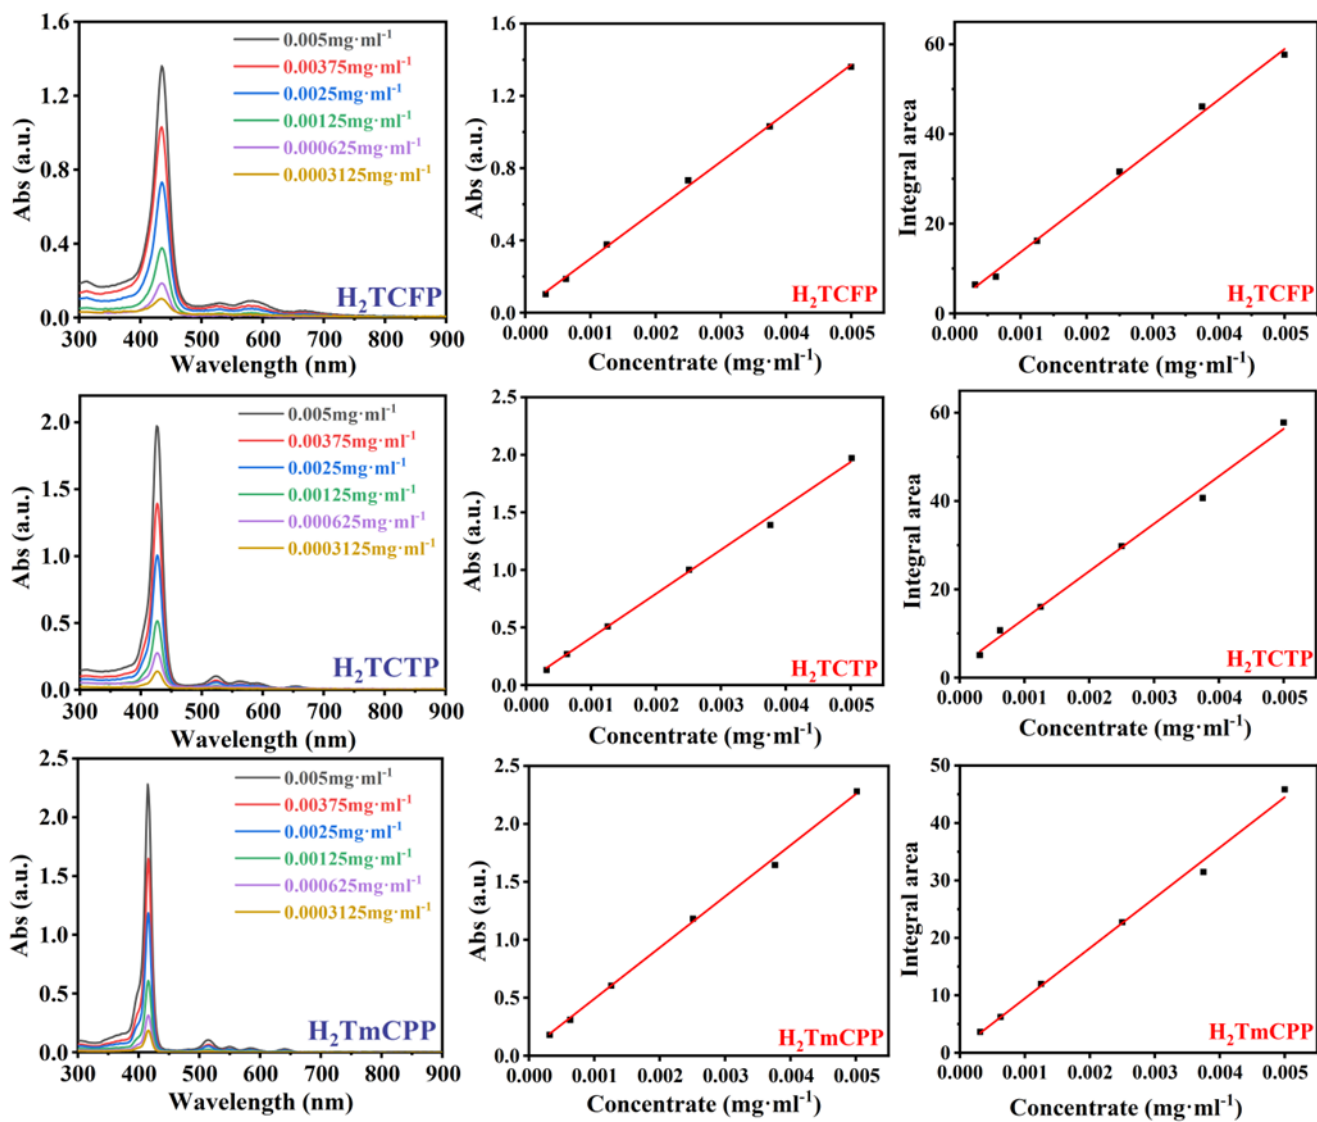

**Figure S1.** Spectra of three types of porphyrins at different concentration (left column), the standard curve (middle column) of absorbance (B band) vs. concentrations, and the standard curve (right column) of integral absorbance (350~500 nm) vs. concentrations. The linear relationship reveals that Lambert-Beer law is validated under the testing conditions.

**Table S1.** The wavelength of UV-vis absorption bands (in nm) for porphyrins of 0.005 mg·mL<sup>-1</sup>

| Porphyrin            | Soret Band (nm)        | $\epsilon^b$ (10 <sup>2</sup> mg <sup>-1</sup> ·mL·cm <sup>-1</sup> ) | $\epsilon^c$ (10 <sup>4</sup> mg <sup>-1</sup> ·mL·cm <sup>-1</sup> ) | Q Band (nm)                 |
|----------------------|------------------------|-----------------------------------------------------------------------|-----------------------------------------------------------------------|-----------------------------|
| H <sub>2</sub> TCFP  | 435 (30 <sup>a</sup> ) | 2.68                                                                  | 1.13                                                                  | 529, 581 <sup>d</sup> , 666 |
| H <sub>2</sub> TCTP  | 427 (19 <sup>a</sup> ) | 3.80                                                                  | 1.07                                                                  | 523, 564, 592, 653          |
| H <sub>2</sub> TmCPP | 416 (12 <sup>a</sup> ) | 4.39                                                                  | 0.87                                                                  | 514, 550, 586, 640          |

<sup>a</sup> : full width at half maximum for porphyrin sample of 0.005 mg·mL<sup>-1</sup>; <sup>b</sup>: the  $\epsilon$  of B band; <sup>c</sup>: the integral  $\epsilon$  over the range of 350~500 nm; <sup>d</sup>: overlapped by two bands

**Table S2.** Some selected electron transition data of H<sub>2</sub>TCFP predicted by TD-DFT calculation together with the orbital

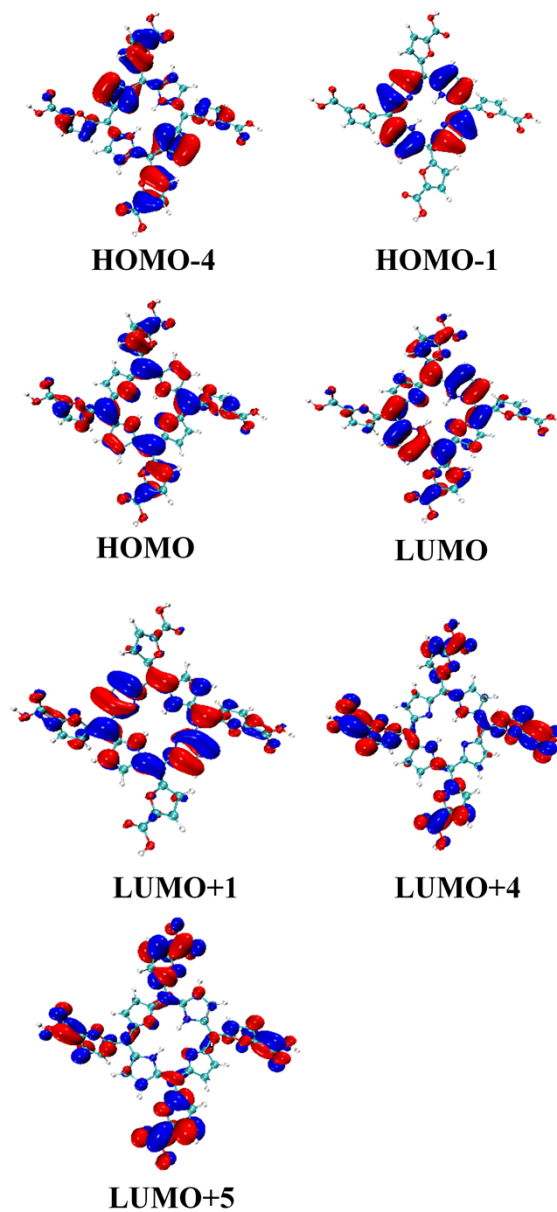

pictures.

| Exciting state | Transition structure | Contribution of transition (%) | Wavelength h (nm) <sup>a</sup> | Oscillator (f) intensity |
|----------------|----------------------|--------------------------------|--------------------------------|--------------------------|
| S1(Q)          | HOMO-1→LUMO          | 27.86                          | 659.83                         | 0.0802                   |
|                | HOMO-1→LUMO+1        | 2.95                           |                                |                          |
|                | HOMO→LUMO            | 9.46                           |                                |                          |
|                | HOMO→LUMO+1          | 58.92                          |                                |                          |
| S2(Q)          | HOMO-1→LUMO          | 3.69                           | 627.05                         | 0.2154                   |
|                | HOMO→LUMO+1          | 20.38                          |                                |                          |
|                | HOMO→LUMO            | 66.89                          |                                |                          |
|                | HOMO→LUMO+1          | 8.80                           |                                |                          |
| S3(B)          | HOMO-7→LUMO+1        | 2.14                           | 451.95                         | 1.2506                   |
|                | HOMO-4→LUMO+1        | 3.36                           |                                |                          |
|                | HOMO-1→LUMO          | 61.20                          |                                |                          |
|                | HOMO→LUMO+1          | 28.06                          |                                |                          |
| S4(B)          | HOMO-7→LUMO          | 3.05                           | 438.55                         | 1.1884                   |
|                | HOMO-1→LUMO+1        | 70.47                          |                                |                          |
|                | HOMO→LUMO            | 22.37                          |                                |                          |
|                | HOMO→LUMO+5          | 2.94                           |                                |                          |
| S7             | HOMO-5→LUMO          | 14.72                          | 406.54                         | 0.2504                   |
|                | HOMO-5→LUMO+1        | 11.58                          |                                |                          |
|                | HOMO-4→LUMO          | 48.96                          |                                |                          |
|                | HOMO-4→LUMO+1        | 19.65                          |                                |                          |
| S10            | HOMO-5→LUMO          | 3.84                           | 399.52                         | 0.0474                   |
|                | HOMO-5→LUMO+1        | 15.46                          |                                |                          |
|                | HOMO-4→LUMO          | 30.78                          |                                |                          |
|                | HOMO-4→LUMO+1        | 45.27                          |                                |                          |
| S12            | HOMO-5→LUMO          | 74.40                          | 387.20                         | 0.0350                   |
|                | HOMO-4→LUMO          | 16.80                          |                                |                          |
|                | HOMO→LUMO+4          | 5.28                           |                                |                          |
| S14            | HOMO-5→LUMO+1        | 67.87                          | 379.44                         | 0.2188                   |
|                | HOMO-4→LUMO+1        | 27.13                          |                                |                          |
| S17            | HOMO-7→LUMO+1        | 4.44                           | 354.97                         | 0.0543                   |
|                | HOMO-5→LUMO          | 3.57                           |                                |                          |
|                | HOMO→LUMO+4          | 85.39                          |                                |                          |
| S19            | HOMO-7→LUMO          | 11.39                          | 349.51                         | 0.0332                   |
|                | HOMO→LUMO+5          | 83.94                          |                                |                          |

<sup>a</sup>: the transition energy is scaled by a factor of 0.9614.

**Table S3.** Some selected electron transition data of H<sub>2</sub>TCTP predicted by TD-DFT calculation together with the orbital

| Exciting state | Transition structure | Contribution of transition (%) | Wavelength h (nm) <sup>a</sup> | Oscillator (f) intensity |
|----------------|----------------------|--------------------------------|--------------------------------|--------------------------|
| S1(Q)          | HOMO-1→LUMO          | 36.66                          | 614.11                         | 0.0241                   |
|                | HOMO→LUMO+1          | 62.25                          |                                |                          |
| S2(Q)          | HOMO-1→LUMO+1        | 33.80                          | 578.89                         | 0.0804                   |
|                | HOMO→LUMO            | 65.60                          |                                |                          |
| S3(B)          | HOMO-7→LUMO+1        | 3.27                           | 430.03                         | 1.0353                   |
|                | HOMO-3→LUMO+1        | 10.87                          |                                |                          |
|                | HOMO-1→LUMO          | 50.45                          |                                |                          |
|                | HOMO→LUMO+1          | 27.44                          |                                |                          |
|                | HOMO→LUMO+4          | 4.91                           |                                |                          |
| S4(B)          | HOMO-7→LUMO          | 3.51                           | 418.71                         | 1.2650                   |
|                | HOMO-1→LUMO+1        | 53.96                          |                                |                          |
|                | HOMO→LUMO            | 28.68                          |                                |                          |
|                | HOMO→LUMO+5          | 11.85                          |                                |                          |
| S8             | HOMO-5→LUMO+1        | 2.34                           | 387.92                         | 0.2457                   |
|                | HOMO-3→LUMO+1        | 56.36                          |                                |                          |
|                | HOMO→LUMO+1          | 2.10                           |                                |                          |
|                | HOMO→LUMO+4          | 36.36                          |                                |                          |
| S10            | HOMO-3→LUMO          | 91.76                          | 385.23                         | 0.1094                   |
|                | HOMO-3→LUMO+1        | 2.28                           |                                |                          |
| S11            | HOMO-7→LUMO+1        | 2.52                           | 380.77                         | 0.1841                   |
|                | HOMO-5→LUMO          | 21.38                          |                                |                          |
|                | HOMO-3→LUMO+1        | 19.23                          |                                |                          |
|                | HOMO-1→LUMO          | 3.62                           |                                |                          |
|                | HOMO→LUMO+1          | 2.56                           |                                |                          |
|                | HOMO→LUMO+4          | 42.24                          |                                |                          |
| S12            | HOMO-7→LUMO          | 5.29                           | 376.99                         | 0.0418                   |
|                | HOMO-5→LUMO+1        | 4.61                           |                                |                          |
|                | HOMO-3→LUMO          | 3.89                           |                                |                          |
|                | HOMO-1→LUMO+1        | 3.21                           |                                |                          |
|                | HOMO-1→LUMO+4        | 3.15                           |                                |                          |
|                | HOMO→LUMO+5          | 73.46                          |                                |                          |
| S17            | HOMO-5→LUMO          | 3.02                           | 366.03                         | 0.0305                   |
|                | HOMO-5→LUMO+1        | 85.59                          |                                |                          |
|                | HOMO-1→LUMO+4        | 2.28                           |                                |                          |
|                | HOMO→LUMO+5          | 3.98                           |                                |                          |

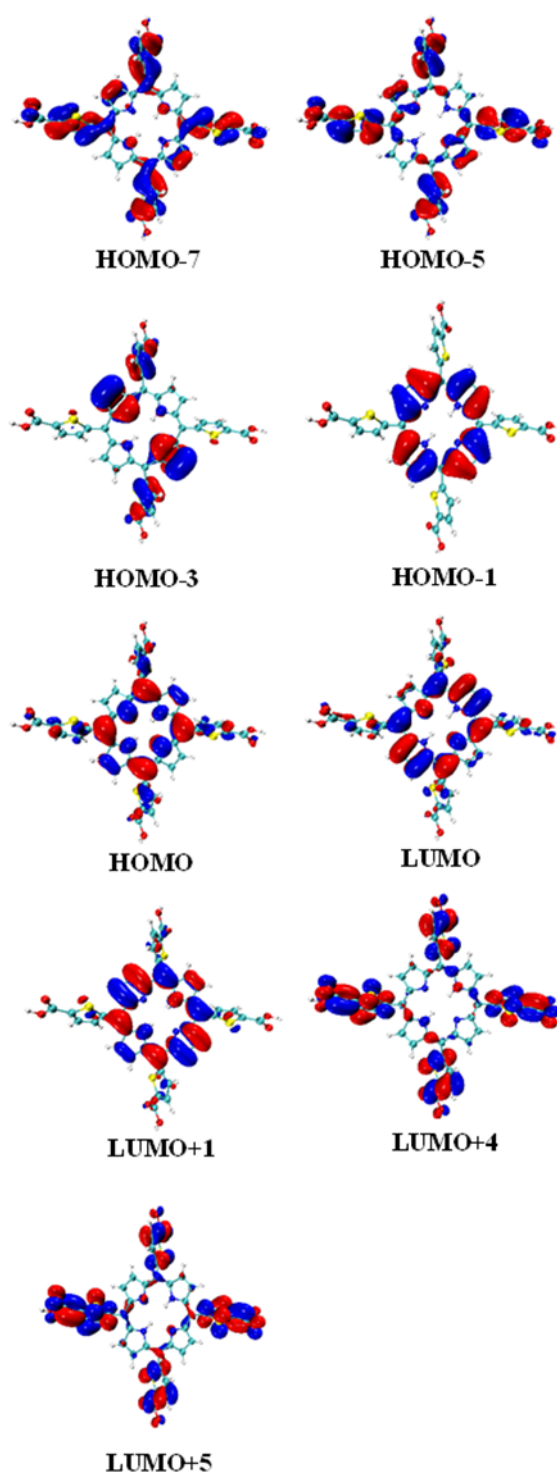

<sup>a</sup>: the transition energy is scaled by a factor of 0.9614.

pictures.

**Table S4.** Some selected electron transition data of H<sub>2</sub>TmCPP predicted by TD-DFT calculation together with the orbital pictures.

| Exciting state | Transition structure | Contribution of transition (%) | Wavelength h (nm) <sup>a</sup> | Oscillator (f) Intensity |
|----------------|----------------------|--------------------------------|--------------------------------|--------------------------|
| S1(Q)          | HOMO-1→LUMO          | 34.26                          | 601.58                         | 0.0212                   |
|                | HOMO→LUMO+1          | 64.70                          |                                |                          |
| S2(Q)          | HOMO-1→LUMO+1        | 35.97                          | 562.97                         | 0.0415                   |
|                | HOMO→LUMO            | 63.34                          |                                |                          |
| S3(B)          | HOMO-3→LUMO+1        | 19.04                          | 413.16                         | 0.8338                   |
|                | HOMO-1→LUMO          | 50.39                          |                                |                          |
|                | HOMO→LUMO+1          | 23.86                          |                                |                          |
|                | HOMO→LUMO+5          | 4.58                           |                                |                          |
| S4(B)          | HOMO-3→LUMO          | 3.84                           | 401.99                         | 1.0652                   |
|                | HOMO-1→LUMO+1        | 47.71                          |                                |                          |
|                | HOMO→LUMO            | 28.00                          |                                |                          |
|                | HOMO→LUMO+4          | 16.95                          |                                |                          |
| S9             | HOMO-3→LUMO          | 2.91                           | 379.72                         | 0.2851                   |
|                | HOMO-1→LUMO+1        | 9.31                           |                                |                          |
|                | HOMO→LUMO            | 5.55                           |                                |                          |
|                | HOMO→LUMO+4          | 75.31                          |                                |                          |
|                | HOMO→LUMO+5          | 4.46                           |                                |                          |
| S11            | HOMO-3→LUMO          | 90.76                          | 364.28                         | 0.2311                   |
|                | HOMO-1→LUMO+1        | 3.87                           |                                |                          |
|                | HOMO-1→LUMO+5        | 2.13                           |                                |                          |
| S12            | HOMO-3→LUMO+1        | 60.49                          | 363.19                         | 0.7222                   |
|                | HOMO-1→LUMO          | 10.47                          |                                |                          |
|                | HOMO-1→LUMO+4        | 11.55                          |                                |                          |
|                | HOMO→LUMO+1          | 8.29                           |                                |                          |
|                | HOMO→LUMO+5          | 7.24                           |                                |                          |
| S15            | HOMO-3→LUMO+1        | 3.40                           | 350.74                         | 0.1026                   |
|                | HOMO-1→LUMO+4        | 64.3                           |                                |                          |
|                | HOMO-1→LUMO+5        | 24.73                          |                                |                          |
| S16            | HOMO-1→LUMO+4        | 22.21                          | 350.19                         | 0.1045                   |
|                | HOMO-1→LUMO+5        | 69.21                          |                                |                          |

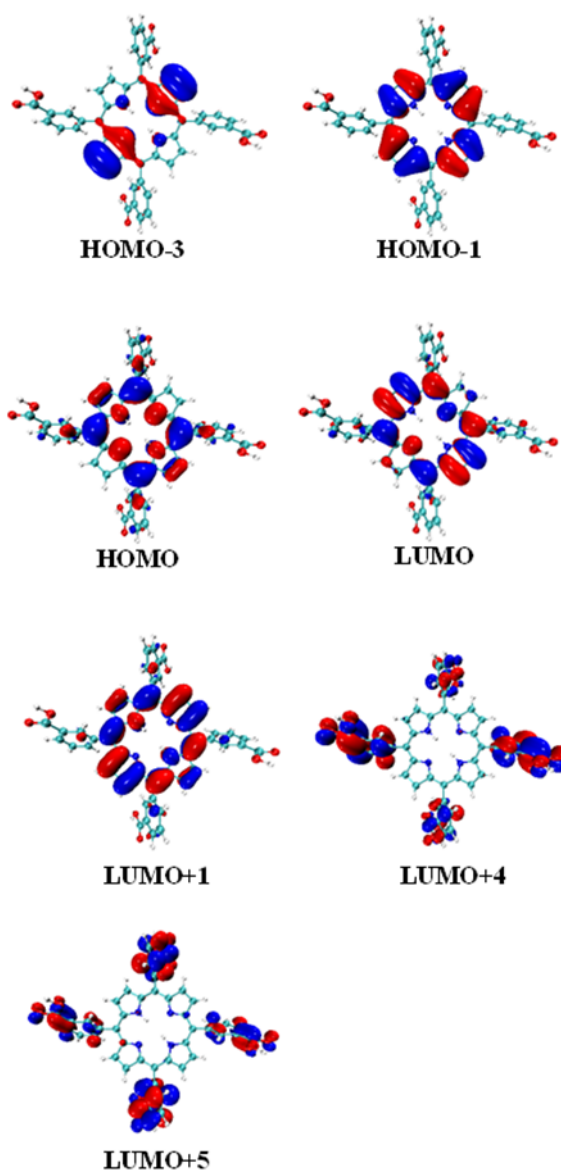

<sup>a</sup>: the transition energy is scaled by a factor of 0.9614.

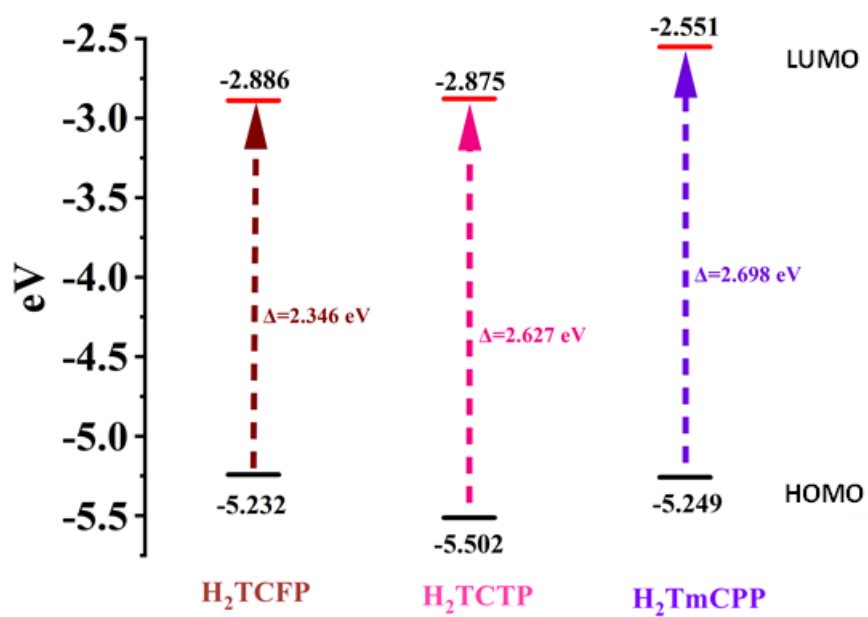

**Figure S2.** Predicted energy level of HOMO and LUMO orbits of three porphyrins based on TD-DFT calculations.

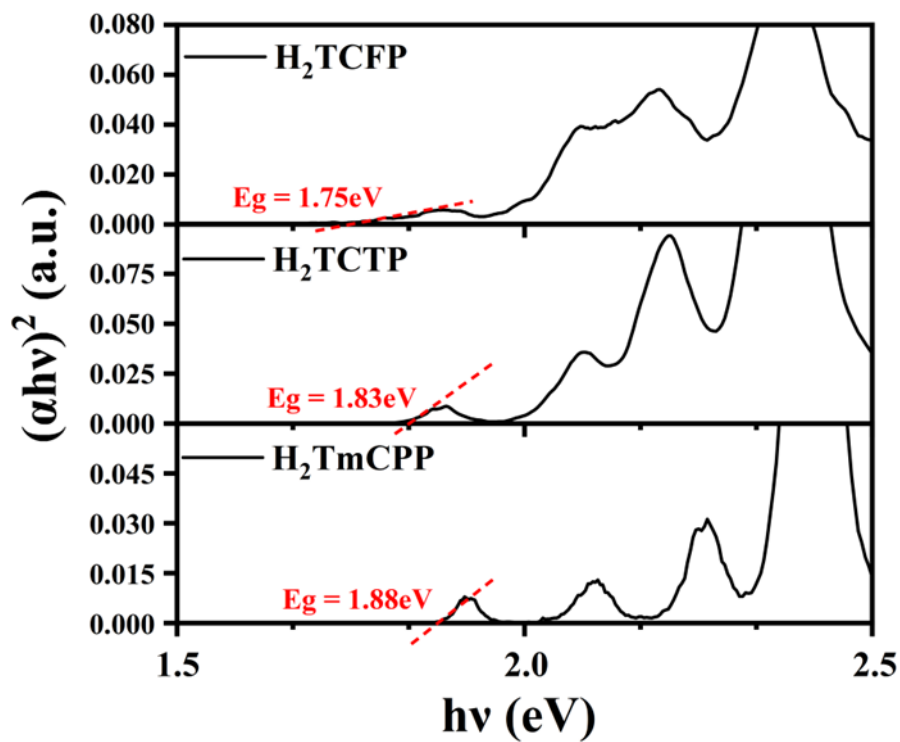

**Figure S3.** Tauc plot of three porphyrins derived from liquid state absorption spectra shown in Figure 1 of the text.

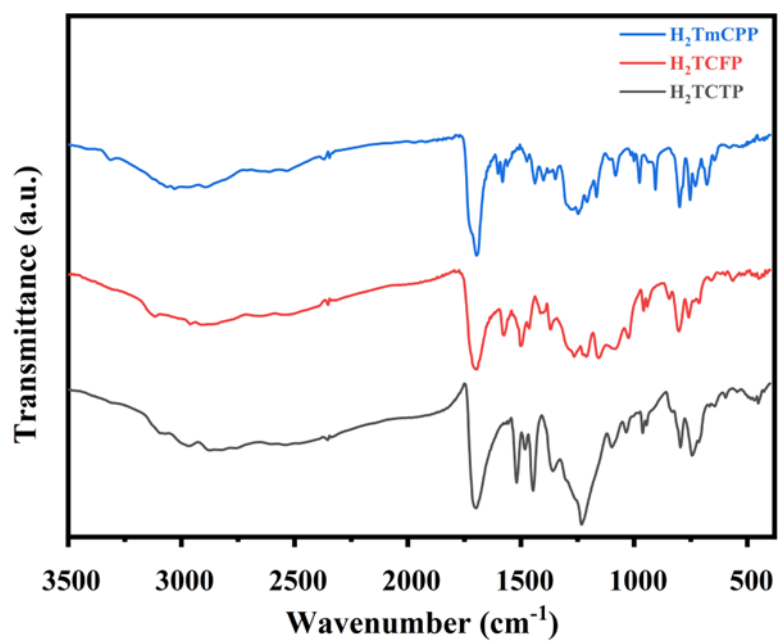

Figure S4. FTIR spectra of H<sub>2</sub>TmCPP, H<sub>2</sub>TCFP and H<sub>2</sub>TCTP.

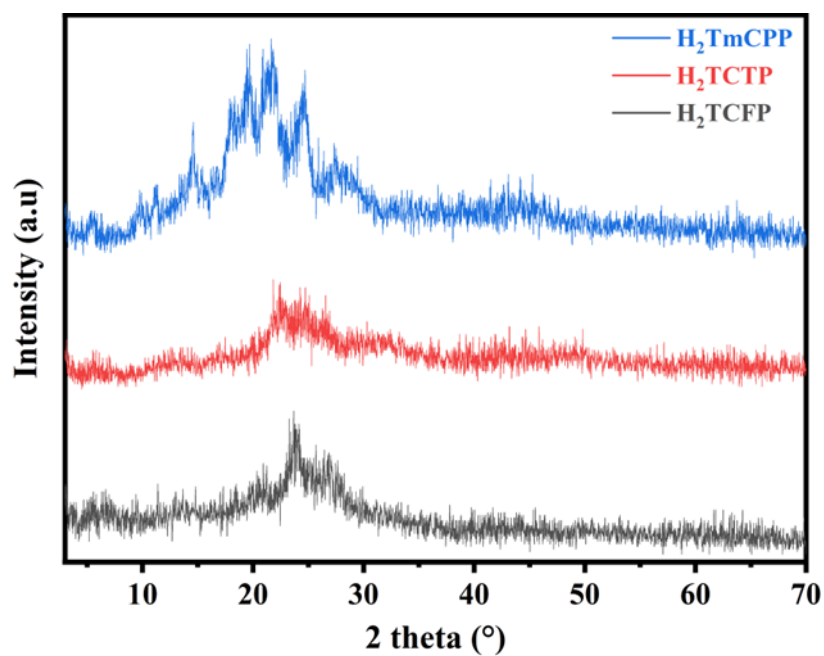

Figure S5. XRD spectra of H<sub>2</sub>TmCPP, H<sub>2</sub>TCTP and H<sub>2</sub>TCFP.



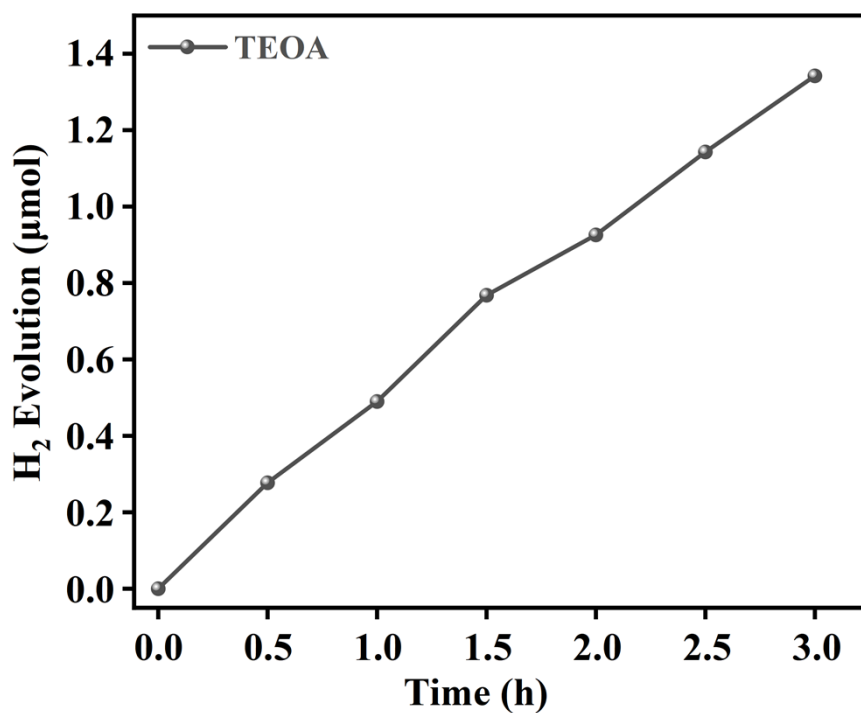

**Figure S6.** H<sub>2</sub> production profile of TEOA solution (10%)

**Table S5.** Comparison of the hydrogen production performance of H<sub>2</sub>TCFP and H<sub>2</sub>TCTP with porphyrin molecules or their compounds reported in recent years.

| Sample Name                              | Hydrogen Evolution Rate<br>( $\mu\text{mol}\cdot\text{g}^{-1}\cdot\text{h}^{-1}$ ) | Ref                                      |
|------------------------------------------|------------------------------------------------------------------------------------|------------------------------------------|
| H <sub>2</sub> TCFP                      | 10800                                                                              | This Work                                |
| H <sub>2</sub> TCTP                      | 9700                                                                               | This Work                                |
| TCPP/Pt/g-C <sub>3</sub> N <sub>4</sub>  | 1208                                                                               | J Colloid Interface Sci 2017, 506, 58-65 |
| SA-TCPP                                  | 40.8                                                                               | Adv. Mater. 2019, 31, 1806626            |
| SA-TPyP                                  | 0.8                                                                                | Adv. Mater. 2019, 31, 1806626            |
| 2% NP/g-C <sub>3</sub> N <sub>4</sub>    | 2297                                                                               | Appl. Surf. Sci. 499 (2020) 143755       |
| g-C <sub>3</sub> N <sub>4</sub> -Cu-TCPP | ~1683                                                                              | Appl. Catal. B 268 (2020) 118434         |
| 5% Cu <sub>2</sub> O/THPP                | ~157.5                                                                             | Appl. Catal., B 211 (2017) 296–304       |
| 30% ZnTHPP/CdS NSs                       | 68.9                                                                               | Adv. Funct. Mater. 2019, 29, 1902992     |
| GO-Co-DPyP                               | 546.5                                                                              | Nanoscale, 2018, 10, 18635–18641         |

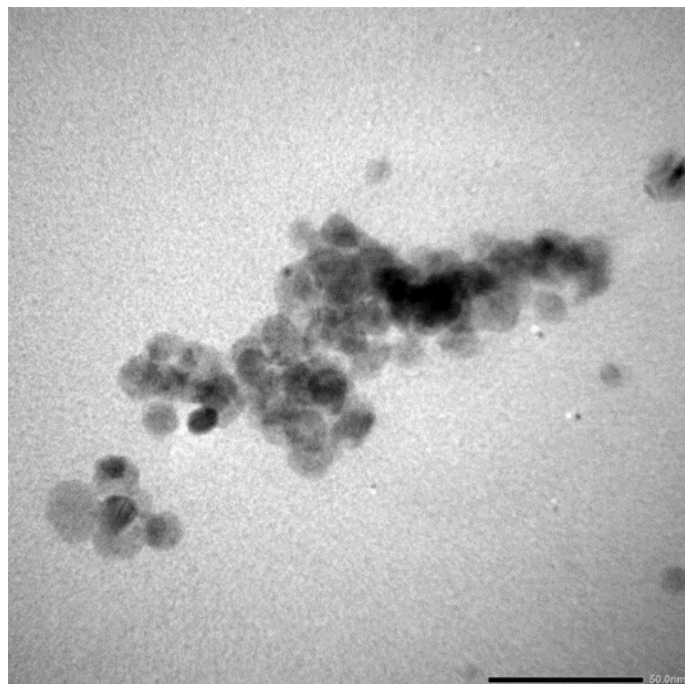

**Figure S7.** TEM image of  $\text{H}_2\text{TCPP}$  of  $0.2 \text{ mg}\cdot\text{mL}^{-1}$  in 10% TEOA aqueous solution. Small particles of  $\sim 10 \text{ nm}$  appear and agglomerate intensively into much larger particle.

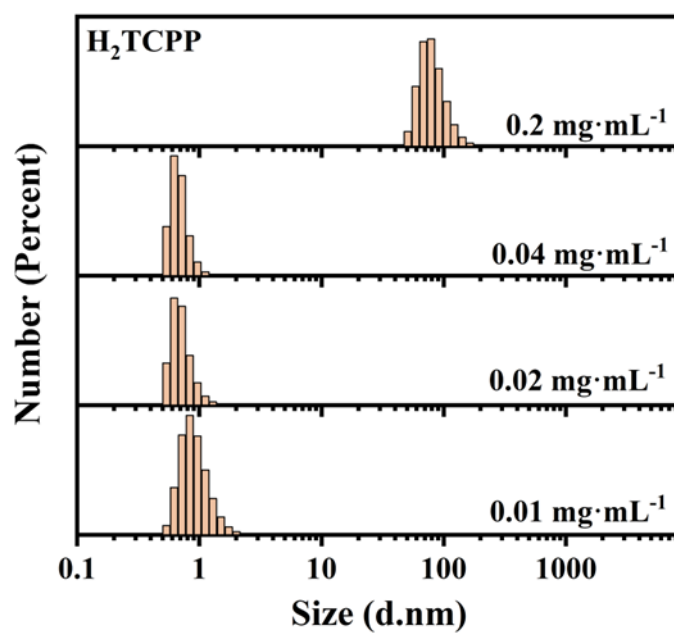

**Figure S8.** Variation of the DLS spectra of  $\text{H}_2\text{TCPP}$  with concentration.

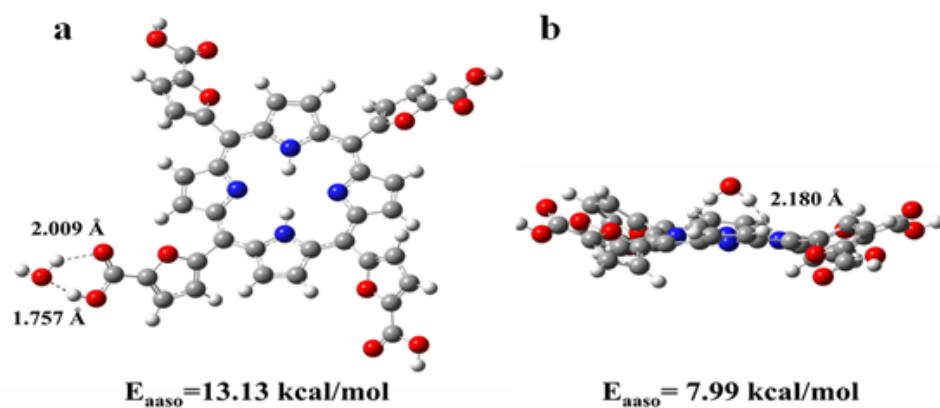

**Figure S9.** Two predicted association modes of H<sub>2</sub>O molecule with H<sub>2</sub>TCFP and the association energy  $E_{\text{aaso}}$ . ( $E_{\text{aaso}} = E(\text{porphyrin}/\text{H}_2\text{O}) - E(\text{porphyrin}) - E(\text{H}_2\text{O}) - E_{\text{bsse}}$ )

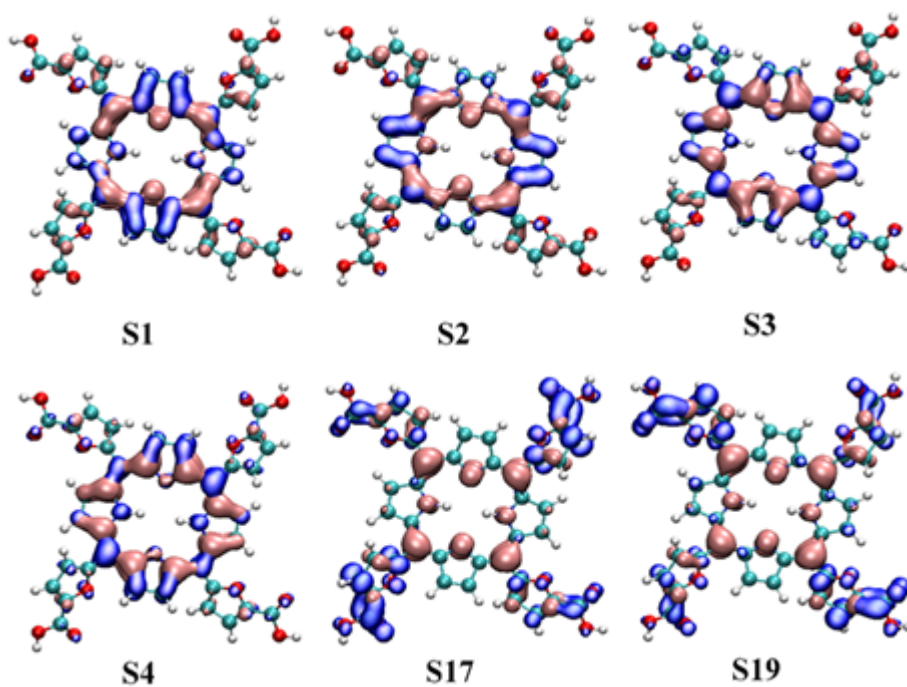

**Figure S10.** Photogenerated carrier distribution of certain electron excitation states for H<sub>2</sub>TCFP predicted by TD-DFT calculation (pink: photogenerated hole distribution, blue: photogenerated electron distribution).

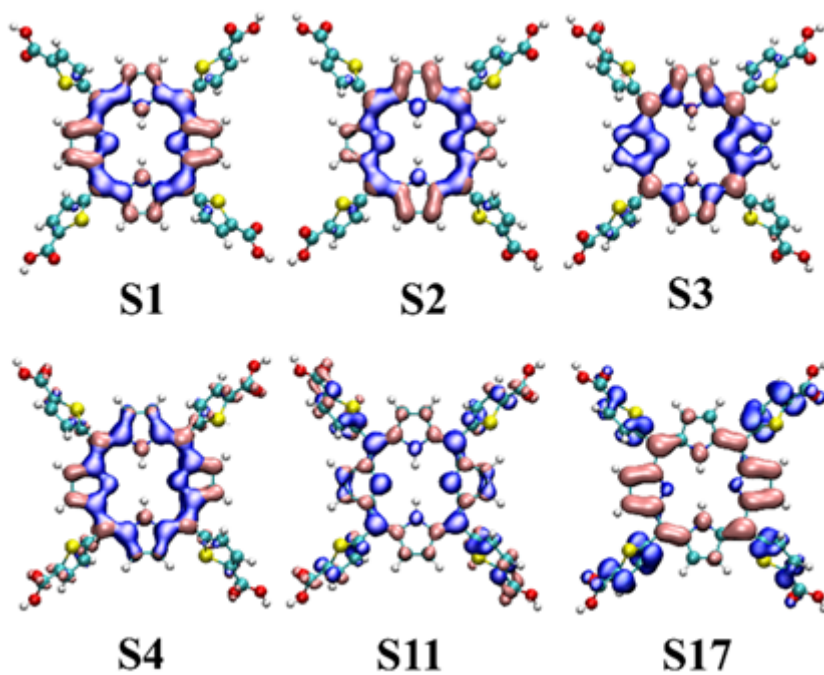

**Figure S11.** Photogenerated carrier distribution of certain electron excitation states for H<sub>2</sub>TCTP predicted by TD-DFT calculation (pink: photogenerated hole distribution, blue: photogenerated electron distribution).

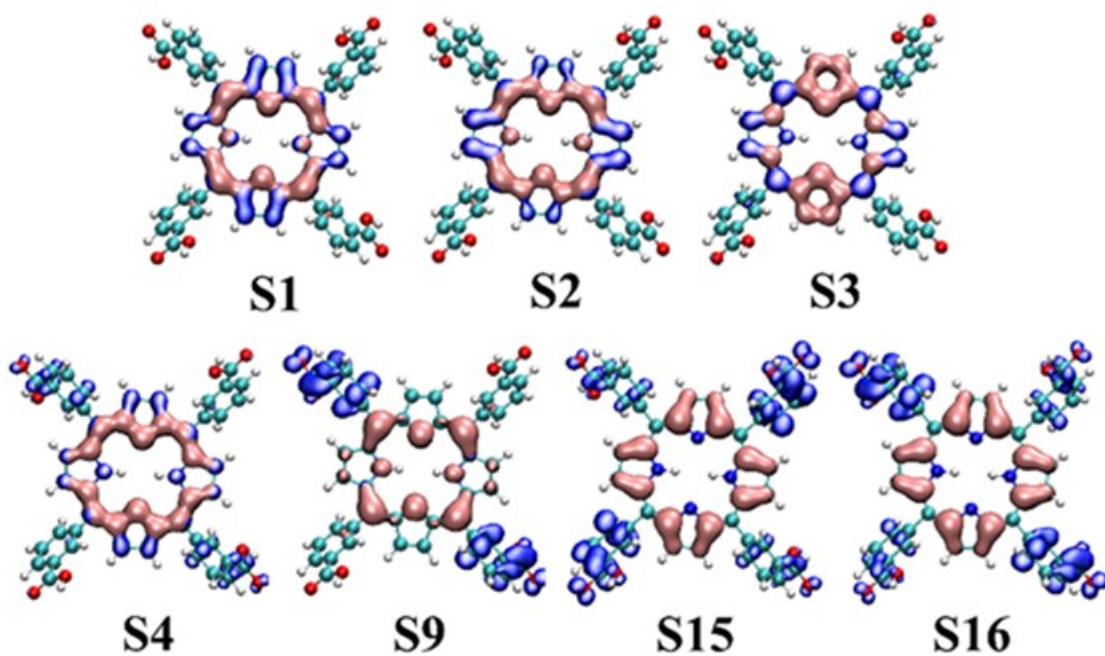

**Figure S12.** Photogenerated carrier distribution of certain electron excitation states for H<sub>2</sub>TmCPP predicted by TD-DFT calculation (pink: photogenerated hole distribution, blue: photogenerated electron distribution).

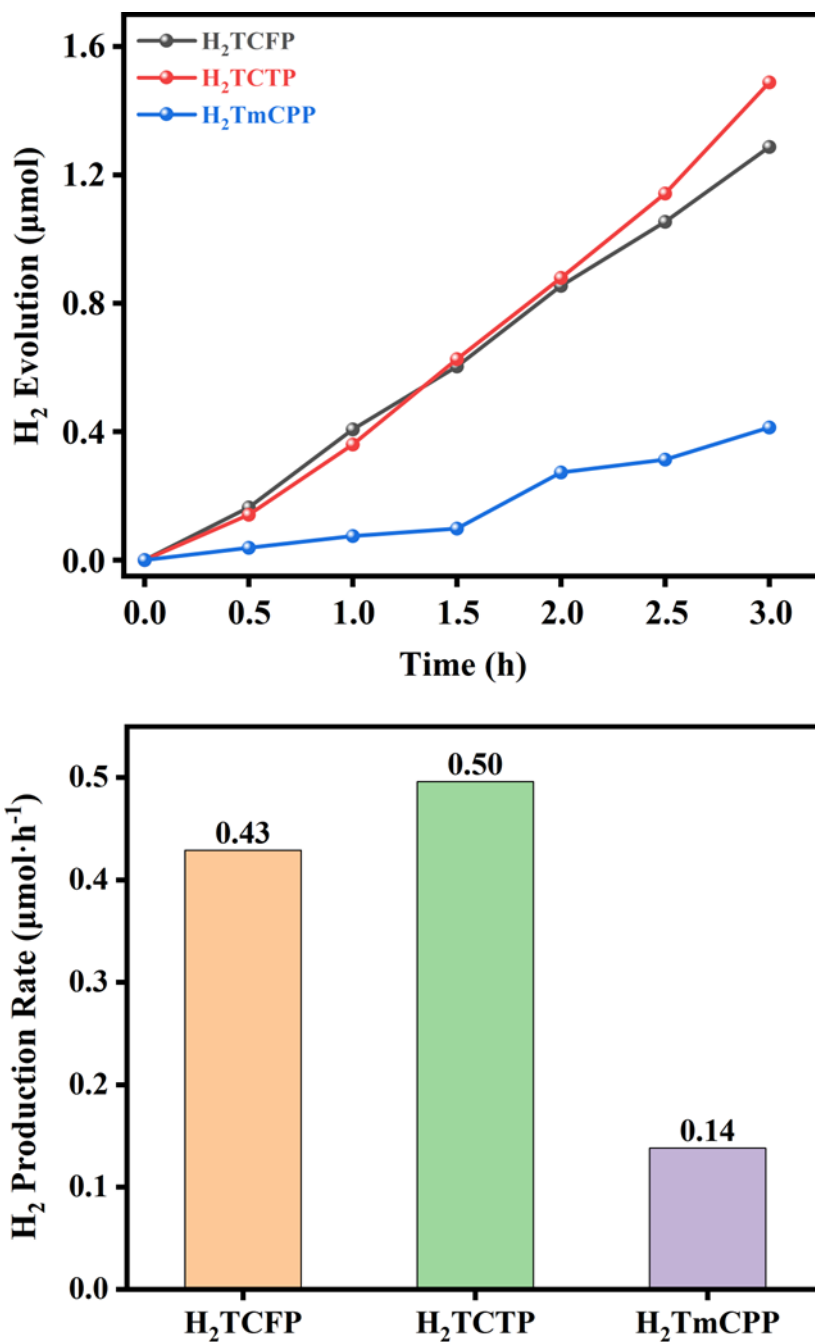

**Figure S13.** Hydrogen evolution profile (up) and production rates (bottom) photocatalyzed by  $\text{H}_2\text{TCFP}$ ,  $\text{H}_2\text{TCTP}$ , and  $\text{H}_2\text{TmCPP}$  at  $0.02 \text{ mg}\cdot\text{mL}^{-1}$  under UV light. ( $\lambda < 365 \text{ nm}$ ).

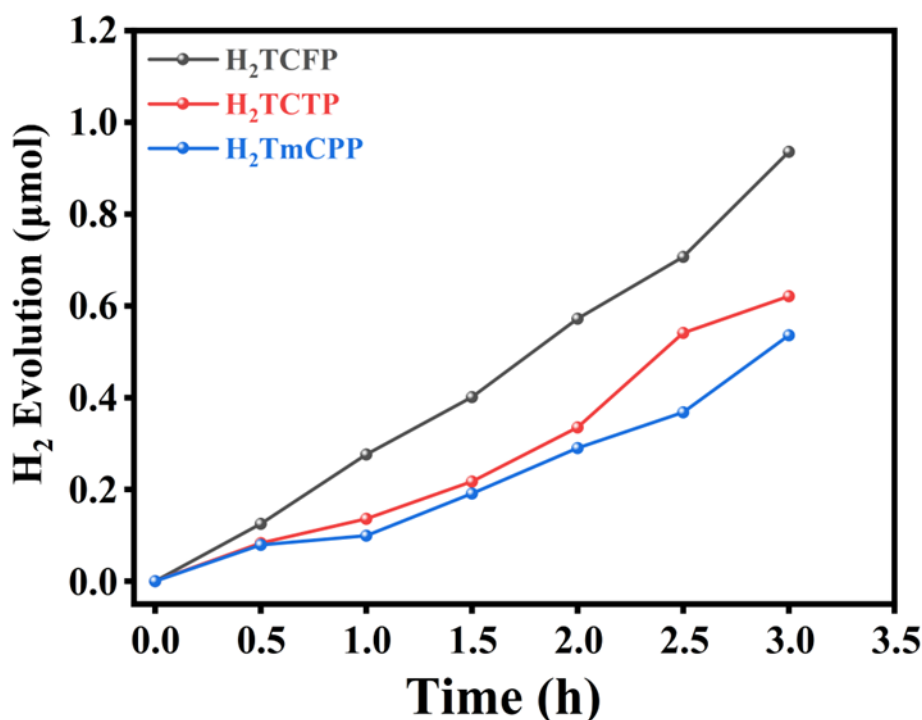

**Figure S14.** Hydrogen evolution profile photocatalyzed by H<sub>2</sub>TCFP, H<sub>2</sub>TCTP, and H<sub>2</sub>TmCPP at 0.04 mg·mL<sup>-1</sup> under UV light. (λ = 365 nm).

### Calculation of Apparent Quantum Yield (AQY):

To assess the incident photon flux, we measured the intensity of monochromatic light at 365nm using a standard photovoltaic cell calibrated to AIST in a solar cell i-v tester (SAN-E1, XES-70S1), while the recorded intensities were 14.3 mW·cm<sup>-2</sup>. The calculated number of incident photons (N) over a 3-hour period is  $2.84 \times 10^{20}$ , as determined by the equation:

$$N(365 \text{ nm}) = \frac{E\lambda}{hc} = \frac{14.3 \times 10^{-3} \times 3 \times 3600 \times 365 \times 10^{-9}}{6.626 \times 10^{-34} \times 3 \times 10^8} = 2.84 \times 10^{20}$$

The equation used to determine the apparent quantum yield for H<sub>2</sub> production (AQY-H<sub>2</sub>) is as follows:

$$AQY = \frac{\text{Number of evolved } H_2 \text{ molecules} \times 2}{\text{Number of incident photons}} \times 100\%$$

$$AQY(H_2TCFP) = \frac{\text{number}(H_2)}{\text{number}(\text{incident photons})} = \frac{0.936 \times 10^{-6} \times 6.02 \times 10^{23} \times 2}{0.284 \times 10^{21}} = 0.4\%$$

$$AQY(H_2TCTP) = \frac{\text{number}(H_2)}{\text{number}(\text{incident photons})} = \frac{0.621 \times 10^{-6} \times 6.02 \times 10^{23} \times 2}{0.284 \times 10^{21}} = 0.26\%$$

$$AQY(H_2TmCPP) = \frac{\text{number}(H_2)}{\text{number}(\text{incident photons})} = \frac{0.536 * 10^{-6} * 6.02 * 10^{23} * 2}{0.284 * 10^{21}} = 0.23\%$$

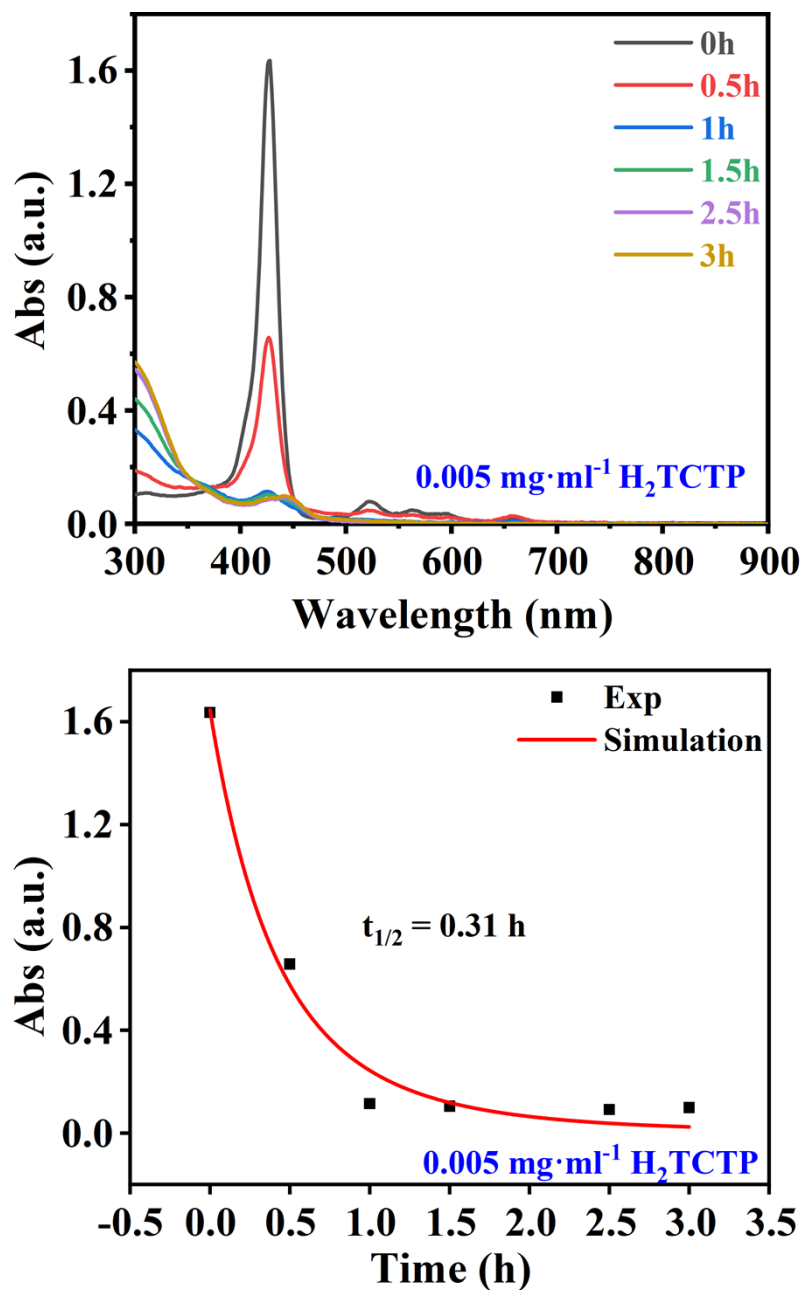

**Figure S15.** Variation of UV-vis spectra with irradiation time for  $0.005 \text{ mg}\cdot\text{mL}^{-1}$  of  $H_2TCTP$  (upper) and the dynamics simulation (bottom). The linear relation between absorbance and time reveals a pseudo first order reaction under the situation with a  $t_{1/2} = 0.31 \text{ h}$ .

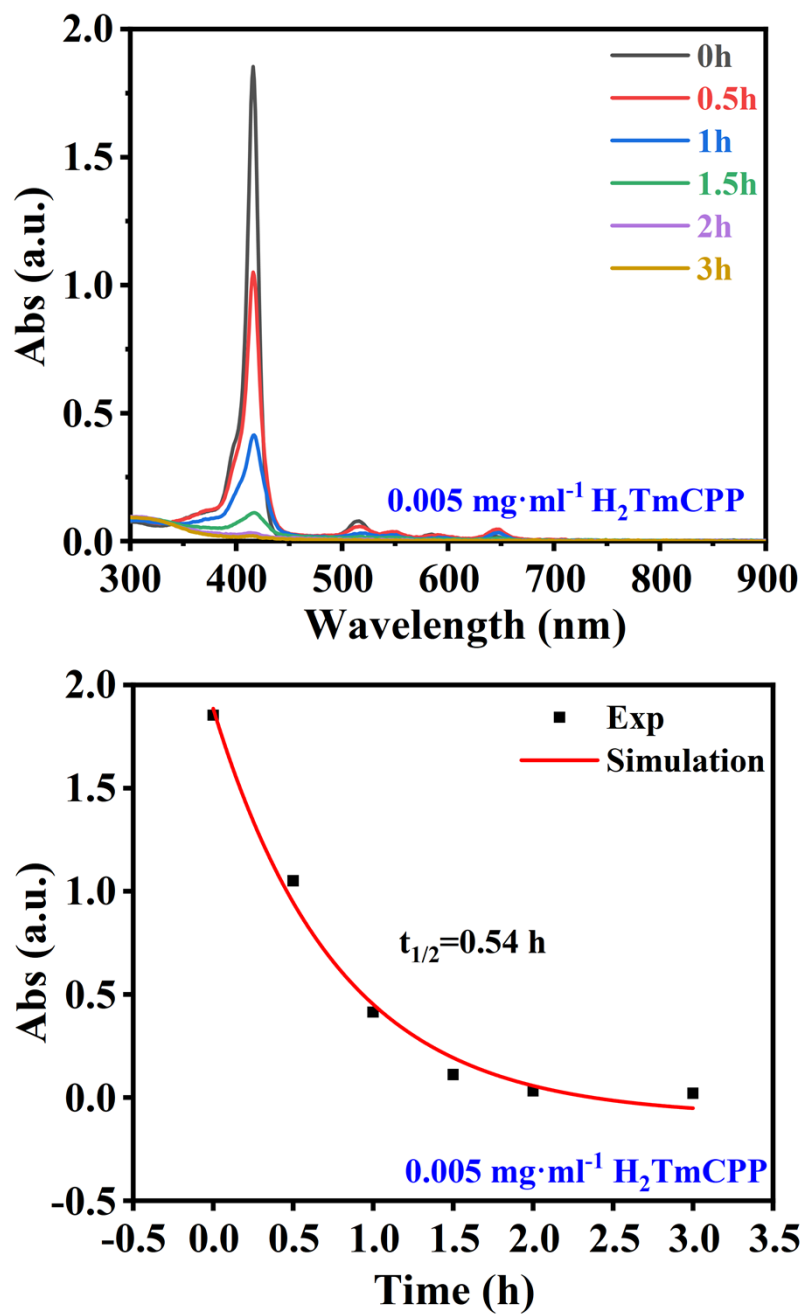

**Figure S16.** Variation of UV-vis spectra with irradiation time for  $0.005 \text{ mg}\cdot\text{mL}^{-1}$  of  $\text{H}_2\text{TmCPP}$  (upper) and the dynamics simulation (bottom). The linear relation between absorbance and time reveals a pseudo first order reaction under the situation with a  $t_{1/2} = 0.54 \text{ h}$ .



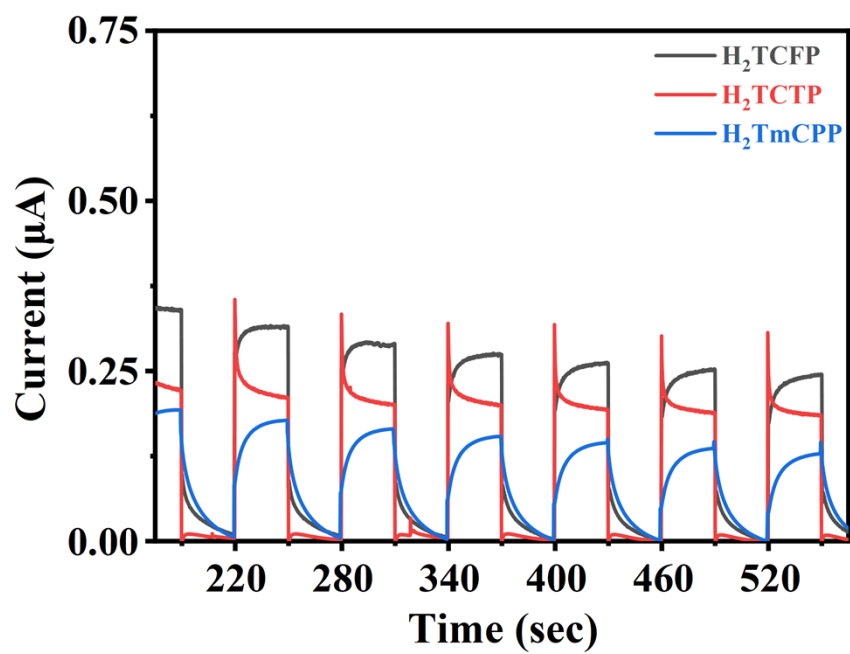

Figure S17. Transient photocurrents of  $\text{H}_2\text{TCFP}$ ,  $\text{H}_2\text{TCTP}$  and  $\text{H}_2\text{TmCPP}$ .

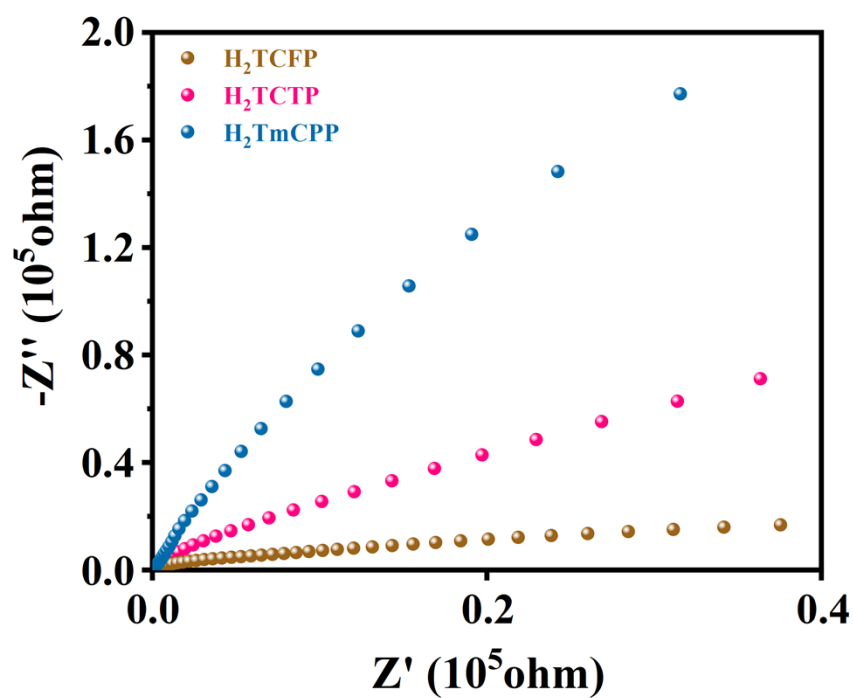

Figure S18. Electrochemical impedance spectroscopies of H<sub>2</sub>TCFP, H<sub>2</sub>TCTP and H<sub>2</sub>TmCPP.

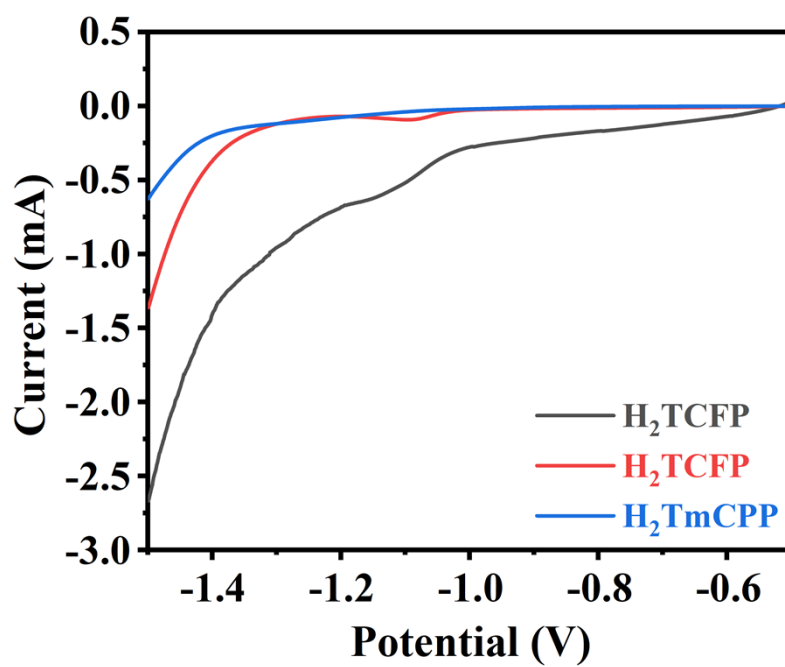

Figure S19. Linear sweep voltammetry test of H<sub>2</sub>TCFP, H<sub>2</sub>TCTP and H<sub>2</sub>TmCPP.

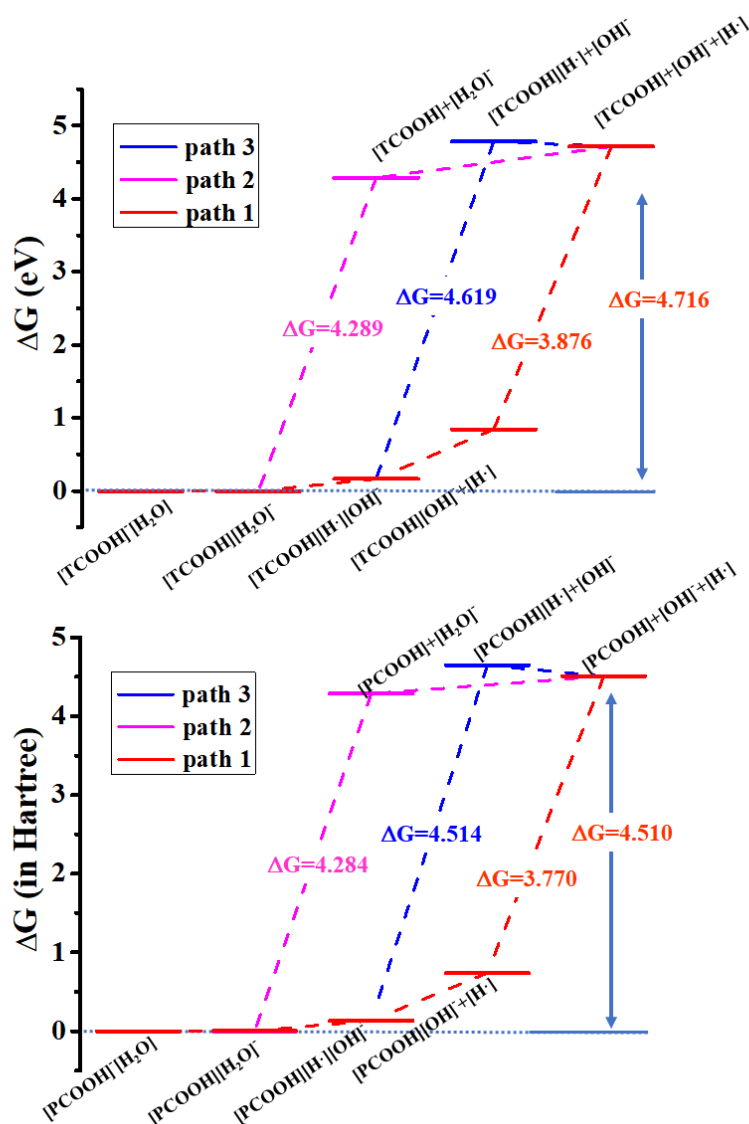

**Figure S20.** Dynamic processes and the change of Gibbs energy ( $\Delta G$  in eV) for the splitting of water molecule associated with thiophenic acid anion (upper), and benzoic acid anion (bottom).

**Table S6.** Gibbs energy for hydrogen binding ( $\Delta G_H$ , in eV) for furoic acid, thiophenic acid, and benzoic acid.

| site | Furoic acid                                                                         | Thiophenic acid                                                                     | Benzoic acid                                                                         |
|------|-------------------------------------------------------------------------------------|-------------------------------------------------------------------------------------|--------------------------------------------------------------------------------------|
|      | 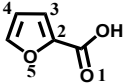 |  |  |
| 1    | 1.855                                                                               | 1.812                                                                               | 1.695                                                                                |
| 2    | 1.111                                                                               | 1.061                                                                               | 1.301                                                                                |
| 3    | 1.074                                                                               | 0.991                                                                               | 1.140                                                                                |
| 4    | 1.484                                                                               | 1.369                                                                               | 1.518                                                                                |
| 5    | 3.320                                                                               | 2.496                                                                               | 1.665                                                                                |

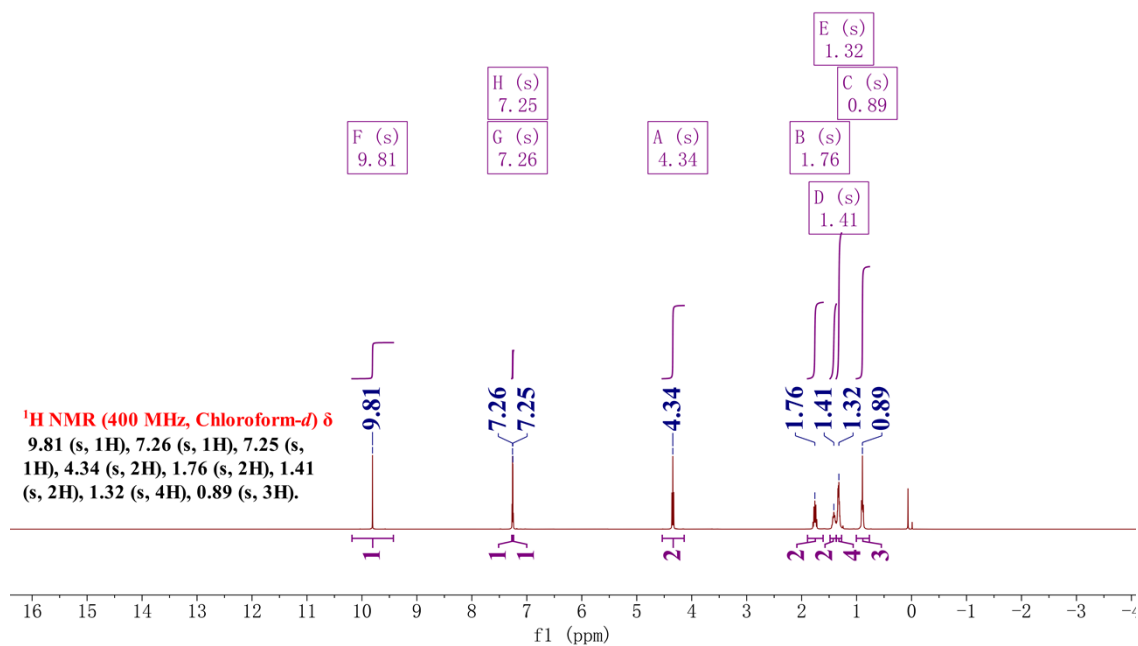

**Figure S21.** <sup>1</sup>H NMR spectrum of hexyl 5-formylfuran-2-carboxylate (400 MHz, Chloroform-*d*)  $\delta$ 9.81 (s, 1H), 7.26 (s, 1H), 7.25 (s, 1H), 4.34 (s, 2H), 1.76 (s, 2H), 1.41 (s, 2H), 1.32 (s, 4H), 0.89 (s, 3H).

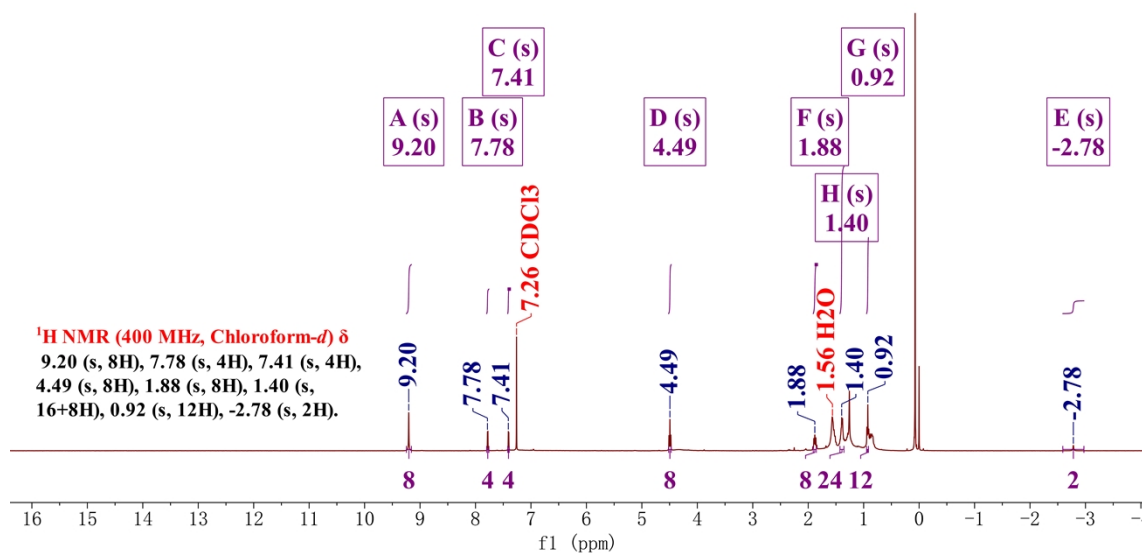

**Figure S22.** <sup>1</sup>H NMR spectrum of meso-tetra(5-hexycarboxyfuryl)porphyrin (400 MHz, Chloroform-*d*)  $\delta$ 9.20 (s, 8H), 7.78 (s, 4H), 7.41 (s, 4H), 4.49 (s, 8H), 1.88 (s, 8H), 1.40 (s, 16+8H), 0.92 (s, 12H), -2.78 (s, 2H).

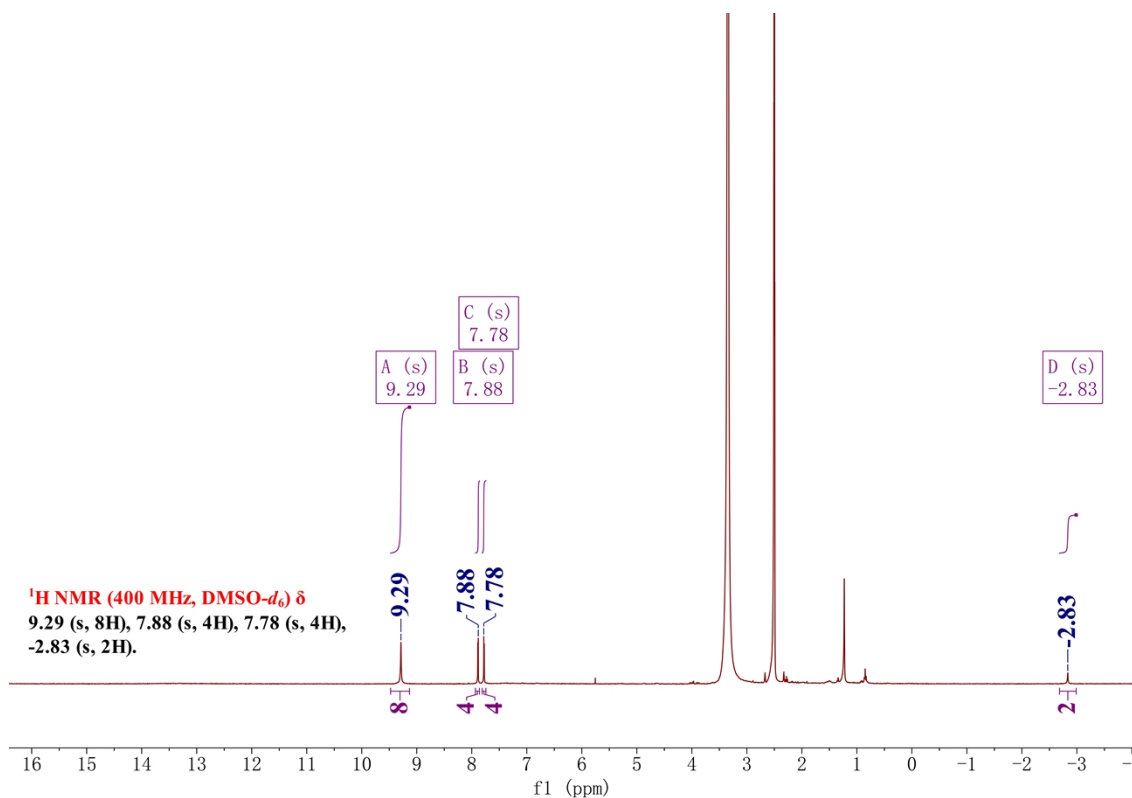

**Figure S23.** <sup>1</sup>H NMR Spectrum of meso-tetra(5-carboxyfuryl)porphyrin (400 MHz, DMSO-*d*<sub>6</sub>) δ 9.29 (s, 8H), 7.88 (s, 4H), 7.78 (s, 4H), -2.83 (s, 2H).

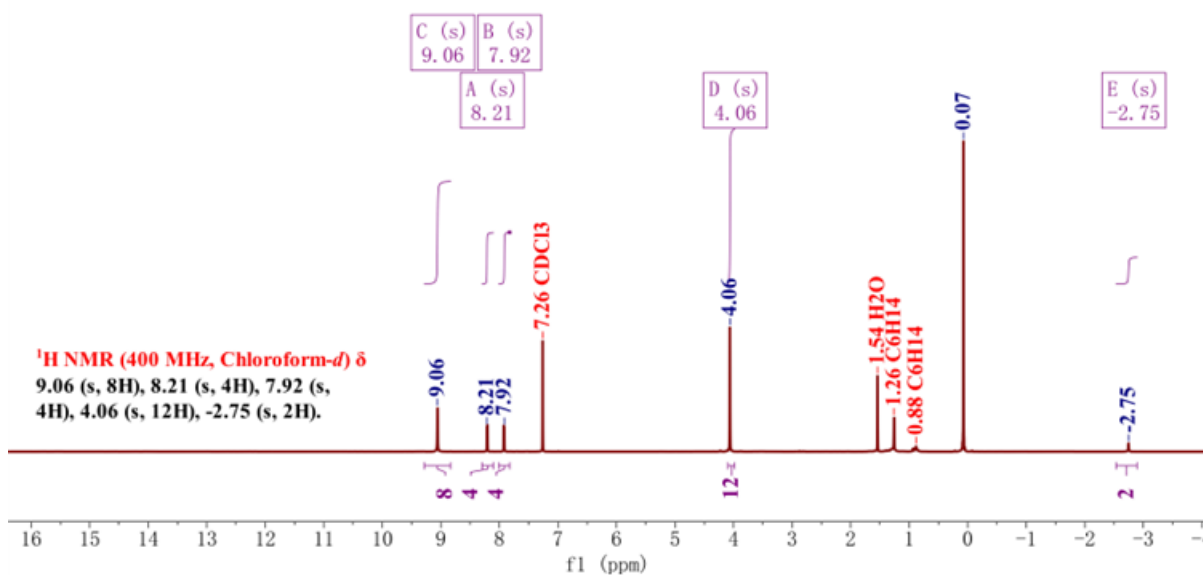

**Figure S24.** <sup>1</sup>H NMR Spectrum of meso-tetra(5-methycarboxythienyl)porphyrin (400 MHz, Chloroform-*d*) δ 9.06 (s, 8H), 8.21 (s, 4H), 7.92 (s, 4H), 4.06 (s, 12H), -2.75 (s, 2H).

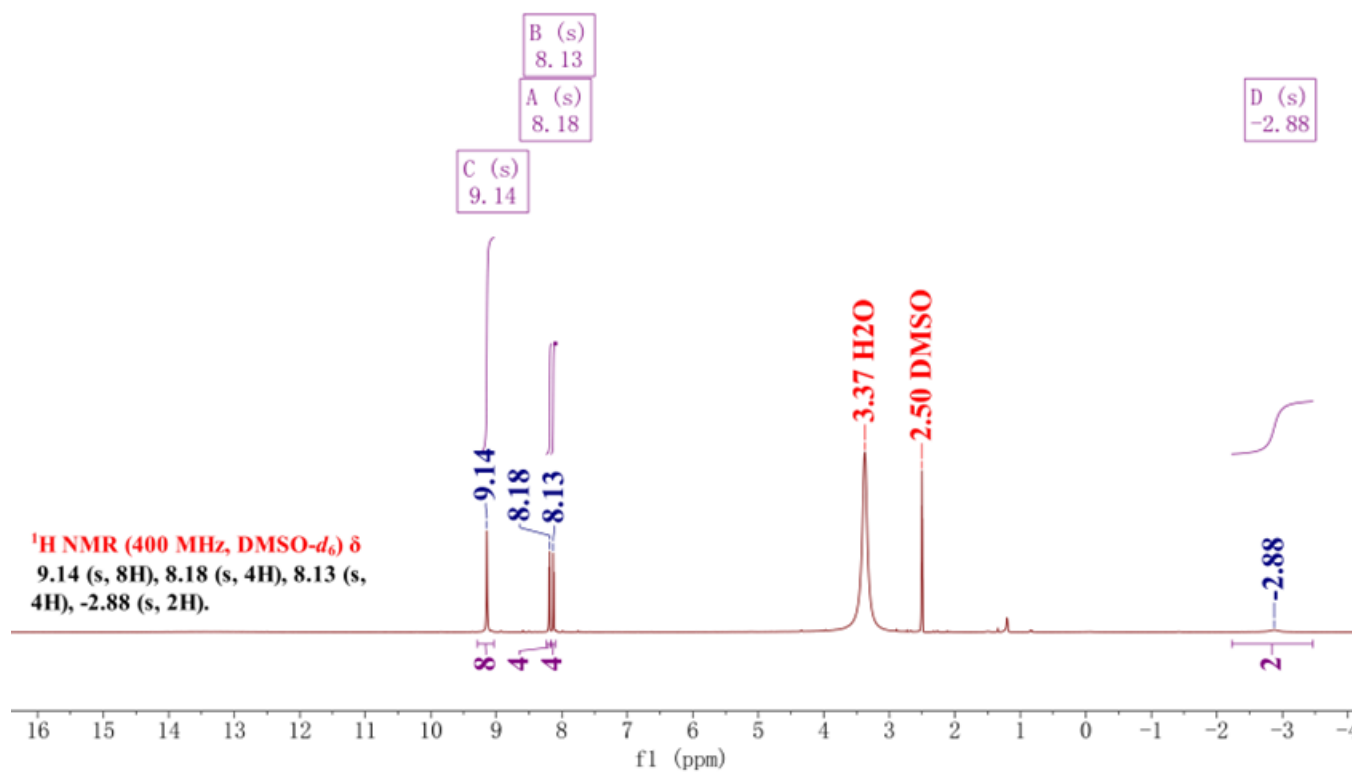

**Figure S25.** <sup>1</sup>H NMR Spectrum of meso-tetra(5-carboxythienyl)porphyrin (400 MHz, DMSO-*d*<sub>6</sub>) δ9.14 (s, 8H), 8.18 (s, 4H), 8.13 (s, 4H), -2.88 (s, 2H).
